# Supplementary material for: African Swine Fever in Wild Boar (Poland 2020): Passive and Active Surveillance Analysis and Further Perspectives
Source: MDPI journal article supplement (doi:10.3390/pathogens10091219), 2021-09-19
Supplement: s1 [file s1]

**Table S1.** Passive surveillance (wild boar found dead).

| Year/ month | Parts II and III  |                   |                   |                           |                         |                         | Parts 0 and I     |                   |                   |                           |                         |                         |
|-------------|-------------------|-------------------|-------------------|---------------------------|-------------------------|-------------------------|-------------------|-------------------|-------------------|---------------------------|-------------------------|-------------------------|
|             | Neg. <sup>1</sup> | Pos. <sup>2</sup> | Tot. <sup>3</sup> | Prev. <sup>4</sup><br>[%] | -95%<br>CI <sup>5</sup> | +95%<br>CI <sup>5</sup> | Neg. <sup>1</sup> | Pos. <sup>2</sup> | Tot. <sup>3</sup> | Prev. <sup>4</sup><br>[%] | -95%<br>CI <sup>5</sup> | +95%<br>CI <sup>5</sup> |
| <b>2020</b> | <b>2209</b>       | <b>5008</b>       | <b>7217</b>       | <b>69.4</b>               | <b>68.3</b>             | <b>70.5</b>             | <b>1400</b>       | <b>52</b>         | <b>1452</b>       | <b>3.6</b>                | <b>2.7</b>              | <b>4.7</b>              |
| January     | 255               | 716               | 971               | 73.7                      | 70.8                    | 76.5                    | 230               | 0                 | 230               | 0.0                       | 0.0                     | 1.6                     |
| February    | 214               | 965               | 1179              | 81.8                      | 79.5                    | 84.0                    | 170               | 29                | 199               | 14.6                      | 10.0                    | 20.3                    |
| March       | 336               | 1118              | 1454              | 76.9                      | 74.6                    | 79.0                    | 163               | 2                 | 165               | 1.2                       | 0.1                     | 4.3                     |
| April       | 268               | 564               | 832               | 67.8                      | 64.5                    | 71.0                    | 84                | 8                 | 92                | 8.7                       | 3.8                     | 16.4                    |
| May         | 188               | 260               | 448               | 58.0                      | 53.3                    | 62.7                    | 70                | 0                 | 70                | 0.0                       | 0.0                     | 5.1                     |
| June        | 138               | 115               | 253               | 45.5                      | 39.2                    | 51.8                    | 77                | 0                 | 77                | 0.0                       | 0.0                     | 4.7                     |
| July        | 190               | 144               | 334               | 43.1                      | 37.7                    | 48.6                    | 184               | 1                 | 185               | 0.5                       | 0.0                     | 3.0                     |
| August      | 139               | 144               | 283               | 50.9                      | 44.9                    | 56.8                    | 54                | 0                 | 54                | 0.0                       | 0.0                     | 6.6                     |
| September   | 108               | 131               | 239               | 54.8                      | 48.3                    | 61.2                    | 70                | 0                 | 70                | 0.0                       | 0.0                     | 5.1                     |
| October     | 115               | 108               | 223               | 48.4                      | 41.7                    | 55.2                    | 67                | 3                 | 70                | 4.3                       | 0.9                     | 12.0                    |
| November    | 123               | 253               | 376               | 67.3                      | 62.3                    | 72.0                    | 88                | 0                 | 88                | 0.0                       | 0.0                     | 4.1                     |
| December    | 135               | 490               | 625               | 78.4                      | 75                      | 81.6                    | 143               | 9                 | 152               | 5.9                       | 2.7                     | 10.9                    |

<sup>1</sup>Neg. – Negative; <sup>2</sup>Pos. – Positive; <sup>3</sup>Tot. – Total; <sup>4</sup>Prev. – Prevalence; <sup>5</sup>CI – confidence interval.**Table S2.** Passive surveillance (roadkilled).

| Year/ month | Parts II and III  |                   |                   |                           |                         |                         | Parts 0 and I     |                   |                   |                           |                         |                         |
|-------------|-------------------|-------------------|-------------------|---------------------------|-------------------------|-------------------------|-------------------|-------------------|-------------------|---------------------------|-------------------------|-------------------------|
|             | Neg. <sup>1</sup> | Pos. <sup>2</sup> | Tot. <sup>3</sup> | Prev. <sup>4</sup><br>[%] | -95%<br>CI <sup>5</sup> | +95%<br>CI <sup>5</sup> | Neg. <sup>1</sup> | Pos. <sup>2</sup> | Tot. <sup>3</sup> | Prev. <sup>4</sup><br>[%] | -95%<br>CI <sup>5</sup> | +95%<br>CI <sup>5</sup> |
| <b>2020</b> | <b>1820</b>       | <b>68</b>         | <b>1888</b>       | <b>3.6</b>                | <b>2.8</b>              | <b>4.5</b>              | <b>7061</b>       | <b>1</b>          | <b>7062</b>       | <b>0.0</b>                | <b>0.0</b>              | <b>0.1</b>              |
| January     | 183               | 7                 | 190               | 3.7                       | 1.5                     | 7.4                     | 898               | 0                 | 898               | 0.0                       | 0.0                     | 0.4                     |
| February    | 122               | 15                | 137               | 10.9                      | 6.3                     | 17.4                    | 607               | 0                 | 607               | 0.0                       | 0.0                     | 0.6                     |
| March       | 142               | 5                 | 147               | 3.4                       | 1.1                     | 7.8                     | 610               | 0                 | 610               | 0.0                       | 0.0                     | 0.6                     |
| April       | 73                | 1                 | 74                | 1.4                       | 0.0                     | 7.3                     | 257               | 0                 | 257               | 0.0                       | 0.0                     | 1.4                     |
| May         | 83                | 1                 | 84                | 1.2                       | 0.0                     | 6.5                     | 241               | 0                 | 241               | 0.0                       | 0.0                     | 1.5                     |
| June        | 117               | 2                 | 119               | 1.7                       | 0.2                     | 5.9                     | 408               | 0                 | 408               | 0.0                       | 0.0                     | 0.9                     |
| July        | 108               | 4                 | 112               | 3.6                       | 1.0                     | 8.9                     | 977               | 0                 | 977               | 0.0                       | 0.0                     | 0.4                     |
| August      | 138               | 2                 | 140               | 1.4                       | 0.2                     | 5.1                     | 486               | 0                 | 486               | 0.0                       | 0.0                     | 0.8                     |
| September   | 166               | 8                 | 174               | 4.6                       | 2.0                     | 8.9                     | 582               | 1                 | 583               | 0.2                       | 0.0                     | 1.0                     |
| October     | 222               | 3                 | 225               | 1.3                       | 0.3                     | 3.8                     | 627               | 0                 | 627               | 0.0                       | 0.0                     | 0.6                     |
| November    | 229               | 15                | 244               | 6.1                       | 3.5                     | 9.9                     | 604               | 0                 | 604               | 0.0                       | 0.0                     | 0.6                     |
| December    | 237               | 5                 | 242               | 2.1                       | 0.7                     | 4.8                     | 764               | 0                 | 764               | 0.0                       | 0.0                     | 0.5                     |

<sup>1</sup>Neg. – Negative; <sup>2</sup>Pos. – Positive; <sup>3</sup>Tot. – Total; <sup>4</sup>Prev. – Prevalence; <sup>5</sup>CI – confidence interval.**Table S3.** Active surveillance (hunted wild boar).

| Year/ month | Parts II and III  |                   |                   |                           |                         |                         | Parts 0 and I     |                   |                   |                           |                         |                         |
|-------------|-------------------|-------------------|-------------------|---------------------------|-------------------------|-------------------------|-------------------|-------------------|-------------------|---------------------------|-------------------------|-------------------------|
|             | Neg. <sup>1</sup> | Pos. <sup>2</sup> | Tot. <sup>3</sup> | Prev. <sup>4</sup><br>[%] | -95%<br>CI <sup>5</sup> | +95%<br>CI <sup>5</sup> | Neg. <sup>1</sup> | Pos. <sup>2</sup> | Tot. <sup>3</sup> | Prev. <sup>4</sup><br>[%] | -95%<br>CI <sup>5</sup> | +95%<br>CI <sup>5</sup> |
| <b>2020</b> | <b>83373</b>      | <b>1053</b>       | <b>84426</b>      | <b>1.2</b>                | <b>1.2</b>              | <b>1.3</b>              | <b>51003</b>      | <b>9</b>          | <b>51012</b>      | <b>0.0</b>                | <b>0.0</b>              | <b>0.0</b>              |
| January     | 6800              | 125               | 6925              | 1.8                       | 1.5                     | 2.1                     | 4703              | 0                 | 4703              | 0.0                       | 0.0                     | 0.1                     |
| February    | 5957              | 86                | 6043              | 1.4                       | 1.1                     | 1.8                     | 3119              | 0                 | 3119              | 0.0                       | 0.0                     | 0.1                     |
| March       | 9050              | 143               | 9193              | 1.6                       | 1.3                     | 1.8                     | 4615              | 1                 | 4616              | 0.0                       | 0.0                     | 0.1                     |
| April       | 7723              | 130               | 7853              | 1.7                       | 1.4                     | 2.0                     | 4045              | 0                 | 4045              | 0.0                       | 0.0                     | 0.1                     |
| May         | 8099              | 130               | 8229              | 1.6                       | 1.3                     | 1.9                     | 4186              | 0                 | 4186              | 0.0                       | 0.0                     | 0.1                     |
| June        | 7337              | 67                | 7404              | 0.9                       | 0.7                     | 1.1                     | 3994              | 0                 | 3994              | 0.0                       | 0.0                     | 0.1                     |
| July        | 4926              | 47                | 4973              | 0.9                       | 0.7                     | 1.3                     | 5913              | 1                 | 5914              | 0.0                       | 0.0                     | 0.1                     |
| August      | 4987              | 64                | 5051              | 1.3                       | 1.0                     | 1.6                     | 2905              | 0                 | 2905              | 0.0                       | 0.0                     | 0.1                     |
| September   | 6301              | 74                | 6375              | 1.2                       | 0.9                     | 1.5                     | 3066              | 0                 | 3066              | 0.0                       | 0.0                     | 0.1                     |
| October     | 7122              | 56                | 7178              | 0.8                       | 0.6                     | 1.0                     | 3491              | 0                 | 3491              | 0.0                       | 0.0                     | 0.1                     |
| November    | 9134              | 127               | 9261              | 1.4                       | 1.1                     | 1.6                     | 4846              | 5                 | 4851              | 0.1                       | 0.0                     | 0.2                     |
| December    | 9355              | 129               | 9484              | 1.3                       | 1.3                     | 1.4                     | 6120              | 2                 | 6122              | 0.0                       | 0.0                     | 0.1                     |

<sup>1</sup>Neg. – Negative; <sup>2</sup>Pos. – Positive; <sup>3</sup>Tot. – Total; <sup>4</sup>Prev. – Prevalence; <sup>5</sup>CI – confidence interval.
